# Supplementary material
Source: ML conference proceedings conference paper supplement (https://openaccess.thecvf.com/content/WACV2021/html/Tang_Auto-Navigator_Decoupled_Neural_WACV_2021_paper.html)
Supplement: Supplementary file 2 [file Tang_Auto-Navigator_Decoupled_Neural_WACV_2021_supplemental.zip]

# Auto-Navigator: Decoupled Neural Architecture Search for Visual Navigation

## Appendix A. Video

In our attached video, we show the examples of Auto-Navigator-S on Gibson. Each frame consists of RGB images, depth maps, surface normals, top-down view map, image reconstruction output, depth prediction, surface normals prediction, distribution for actions. The green line in the map represents the shortest path in the episode.

## Appendix B. Performance With Steps

Figure 1 shows the performance of different search spaces with 100M training steps.

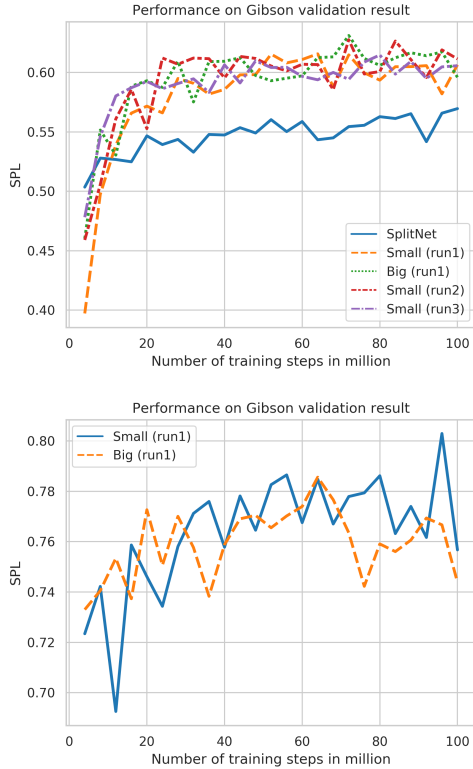

Figure 1: **Top:** Validation SPL during 100 million training steps with different architectures via Behavior Cloning. **Bottom:** Validation SPL during 100 million training steps with different search spaces via PPO.

## Appendix C. Searched Network Architecture

Figure 2 shows the structures of searched perception modules. We list the architecture with different search spaces.

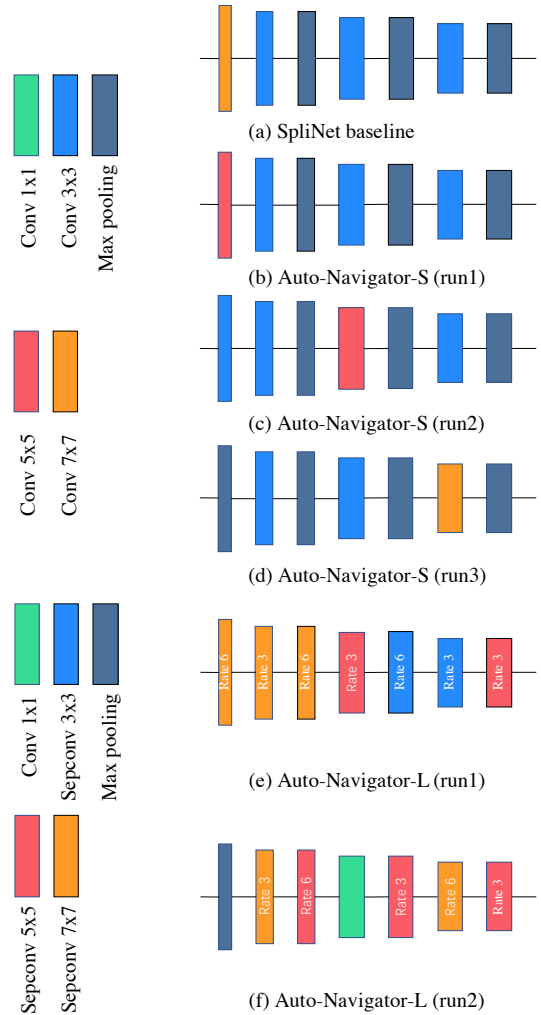

Figure 2: Searched architectures with different search spaces.
